# Supplementary material for: Computing the Structural Dynamics of RVFV L Protein Domain in Aqueous Glycerol Solutions
Source: MDPI journal article supplement (doi:10.3390/biom11101427), 2021-09-29
Supplement: s1 [file s1]

# Supplementary Material for: Computing the Structural Dynamics of RVFV L Protein Domain in Aqueous Glycerol Solutions

Gideon K. Gogovi<sup>1</sup>, Swabir Silayi<sup>2</sup>, and Amarda Shehu<sup>3,4,5,6</sup>

- <sup>1</sup> Department of Mathematics and Statistics, University of Houston - Downtown  
<sup>2</sup> Office of Research Computing, George Mason University  
<sup>3</sup> Department of Computer Science, George Mason University  
<sup>4</sup> Department of Bioengineering, George Mason University  
<sup>5</sup> School of Systems Biology, George Mason University  
<sup>6</sup> Center for Advancing Human-Machine Partnerships, George Mason University

## Summary of Simulations: Glycerol proportion ( $x_1$ ) and water proportion ( $x_2$ ).

| $x_1 : x_2$ | # atoms | Time (ns)       | box size/side (Å) |
|-------------|---------|-----------------|-------------------|
| 100:00      | 43849   | $100 \times 7$  | 71.421            |
| 90:10       | 44230   | $100 \times 5$  | 71.527            |
| 80:20       | 44611   | $100 \times 9$  | 71.580            |
| 70:30       | 44992   | $100 \times 5$  | 71.961            |
| 60:40       | 45373   | $100 \times 5$  | 72.502            |
| 50:50       | 45754   | $100 \times 10$ | 73.061            |
| 40:60       | 46135   | $100 \times 5$  | 73.788            |
| 30:70       | 46516   | $100 \times 4$  | 74.225            |
| 20:80       | 46897   | $100 \times 8$  | 74.845            |
| 10:90       | 47278   | $100 \times 7$  | 75.470            |

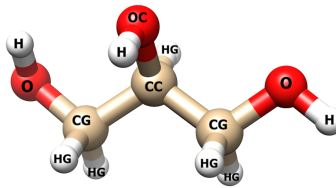

Figure S1: Atom identification in the glycerol molecule.

**Density,  $\rho$  of glycerol ( $x_1$ ) : water ( $x_2$ ) mixtures at 298.15 K and atmospheric pressure.**

| $x_1 : x_2$ | Calculated $\rho$ (g/cm <sup>3</sup> ) | Experimental $\rho$ (g/cm <sup>3</sup> ) |
|-------------|----------------------------------------|------------------------------------------|
| 100 : 00    | 1.259 $\pm$ 0.002                      | 1.25791                                  |
| 90 : 10     | 1.253 $\pm$ 0.003                      | 1.25331                                  |
| 80 : 20     | 1.250 $\pm$ 0.002                      | 1.24648                                  |
| 70 : 30     | 1.230 $\pm$ 0.001                      | 1.23632                                  |
| 60 : 40     | 1.202 $\pm$ 0.002                      | 1.22565                                  |
| 50 : 50     | 1.174 $\pm$ 0.002                      | 1.21375                                  |
| 40 : 60     | 1.146 $\pm$ 0.001                      | 1.19845                                  |
| 30 : 70     | 1.119 $\pm$ 0.002                      | 1.18300                                  |
| 20 : 80     | 1.091 $\pm$ 0.002                      | 1.14286                                  |
| 10 : 90     | 1.063 $\pm$ 0.002                      | 1.09524                                  |

**Histogram of Radius of gyration of the domain in glycerol solutions.**

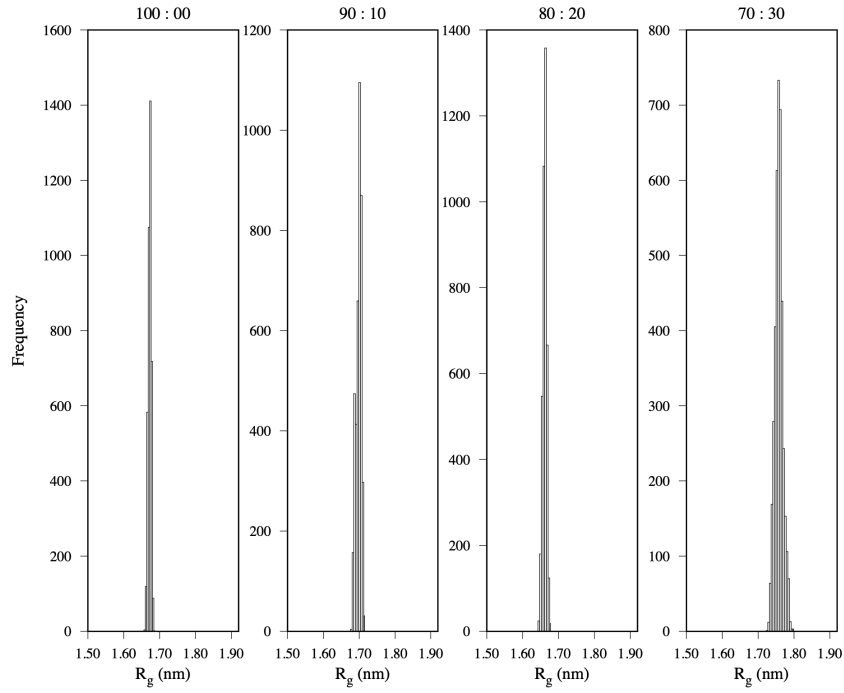

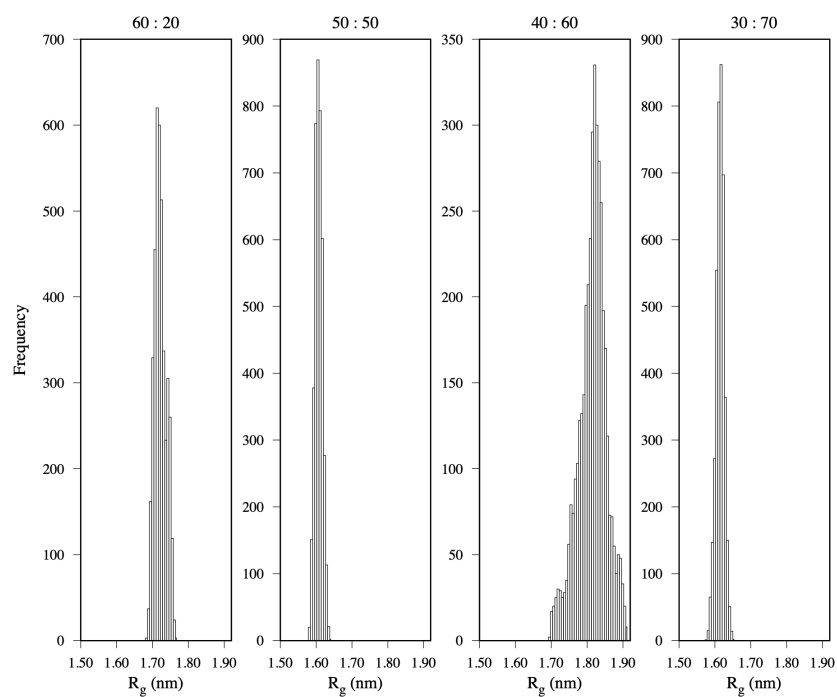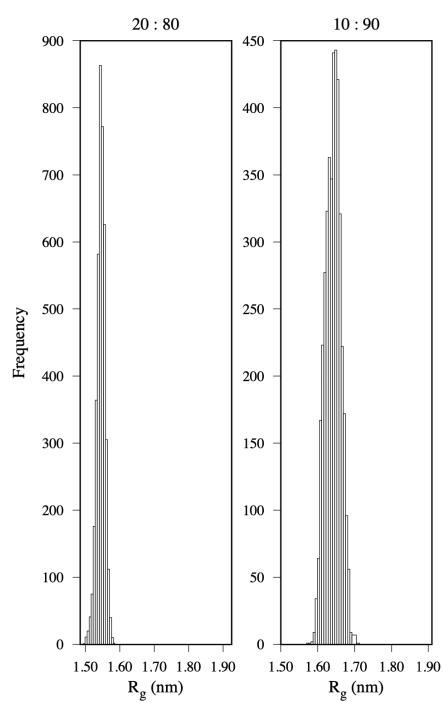

**Comparison of cluster sizes of the protein domain: Average distance between clusters within solvents,  $d_s$  (nm) and Average distance to centroid,  $d_c$  (nm)**

| $x_1 : x_2$ | $d_s$ (nm)        | $d_c$ (nm)        |
|-------------|-------------------|-------------------|
| 100 : 00    | $0.083 \pm 0.002$ | $0.103 \pm 0.004$ |
| 90 : 10     | $0.096 \pm 0.004$ | $0.143 \pm 0.008$ |
| 80 : 20     | $0.110 \pm 0.002$ | $0.157 \pm 0.010$ |
| 70 : 30     | $0.146 \pm 0.066$ | $0.214 \pm 0.008$ |
| 60 : 40     | $0.018 \pm 0.012$ | $0.283 \pm 0.011$ |
| 50 : 50     | $0.171 \pm 0.009$ | $0.262 \pm 0.010$ |
| 40 : 60     | $0.241 \pm 0.020$ | $0.393 \pm 0.023$ |
| 30 : 70     | $0.184 \pm 0.006$ | $0.262 \pm 0.016$ |
| 20 : 80     | $0.192 \pm 0.009$ | $0.264 \pm 0.012$ |
| 10 : 90     | $0.200 \pm 0.026$ | $0.281 \pm 0.020$ |

Table S1: Averages of the structural property evaluation of the domain: Root-mean-squared deviation,  $RMSD$ , Radius of gyration,  $R_g$ , Hydrodynamic radius  $R_{hyd}$ , End-to-end distance  $R_{e-e}$ , and Solvent-accessible surface area,  $SASA$ .

| $x_1 : x_2$ | $RMSD$<br>(nm)   | $R_g$ (nm)       | $R_{hyd}$ (nm)  | $R_g/R_{hyd}$ | $R_{e-e}$ (nm)  | $SASA$ (nm <sup>2</sup> ) |
|-------------|------------------|------------------|-----------------|---------------|-----------------|---------------------------|
| 100:00      | 0.41 $\pm$ 0.003 | 1.67 $\pm$ 0.004 | 3.35 $\pm$ 0.01 | 0.499         | 2.81 $\pm$ 0.03 | 946.36 $\pm$ 30.53        |
| 90:00       | 0.45 $\pm$ 0.01  | 1.70 $\pm$ 0.01  | 3.38 $\pm$ 0.01 | 0.503         | 2.69 $\pm$ 0.05 | 963.39 $\pm$ 6.46         |
| 80:00       | 0.48 $\pm$ 0.01  | 1.66 $\pm$ 0.01  | 3.32 $\pm$ 0.01 | 0.500         | 2.34 $\pm$ 0.21 | 929.85 $\pm$ 36.53        |
| 70:00       | 0.59 $\pm$ 0.02  | 1.76 $\pm$ 0.01  | 3.37 $\pm$ 0.01 | 0.522         | 3.19 $\pm$ 0.15 | 961.55 $\pm$ 27.82        |
| 60:00       | 0.64 $\pm$ 0.03  | 1.72 $\pm$ 0.02  | 3.34 $\pm$ 0.01 | 0.515         | 2.70 $\pm$ 0.30 | 930.23 $\pm$ 56.27        |
| 50:00       | 0.63 $\pm$ 0.02  | 1.61 $\pm$ 0.01  | 3.23 $\pm$ 0.01 | 0.498         | 3.62 $\pm$ 0.31 | 837.14 $\pm$ 40.42        |
| 40:00       | 0.88 $\pm$ 0.07  | 1.81 $\pm$ 0.04  | 3.40 $\pm$ 0.02 | 0.532         | 3.08 $\pm$ 0.54 | 891.02 $\pm$ 76.75        |
| 30:00       | 0.48 $\pm$ 0.02  | 1.61 $\pm$ 0.01  | 3.19 $\pm$ 0.02 | 0.505         | 2.24 $\pm$ 0.09 | 796.71 $\pm$ 32.75        |
| 20:00       | 0.76 $\pm$ 0.02  | 1.54 $\pm$ 0.01  | 3.08 $\pm$ 0.01 | 0.500         | 2.51 $\pm$ 0.10 | 759.11 $\pm$ 66.75        |
| 10:00       | 0.68 $\pm$ 0.03  | 1.64 $\pm$ 0.02  | 3.16 $\pm$ 0.02 | 0.519         | 1.95 $\pm$ 0.37 | 758.29 $\pm$ 39.41        |
| <b>6QHG</b> | <b>0.00</b>      | <b>1.51</b>      | <b>2.91</b>     | <b>0.519</b>  | <b>2.28</b>     | <b>673.71</b>             |
